# Supplementary material for: Peer review of the pesticide risk assessment of the active substance fat distillation residues
Source: PubMed Central journal article supplement (PMC9887467; doi:10.2903/j.efsa.2023.7811), 2023-01-31
Supplement: EFS2-21-e07811-s001.pdf [file EFS2-21-e07811-s001.pdf]

Annex to: Conclusion on the peer review of the pesticide risk assessment of the active substance fat distillation residues. doi:10.2903/j.efsa.2023.7811

© 2023 Wiley-VCH Verlag GmbH & Co. KgaA on behalf of the European Food Safety Authority.

## Appendix B – List of end points for the active substance and the representative formulation

### Identity, Physical and Chemical Properties, Details of Uses, Further Information (Regulation (EU) N° 283/2013, Annex Part A, points 1.3 and 3.2)

|                                    |                                                    |
|------------------------------------|----------------------------------------------------|
| Active substance (ISO Common Name) | Fat distillation residues (FDR) no ISO common name |
| Function ( <i>e.g.</i> fungicide)  | Repellent                                          |
| Rapporteur Member State            | Czech Republic                                     |
| Co-rapporteur Member State         | France                                             |

### Identity (Regulation (EU) N° 283/2013, Annex Part A, point 1)

|                                                                                                                                           |                                                                                                                                                                                                                                 |
|-------------------------------------------------------------------------------------------------------------------------------------------|---------------------------------------------------------------------------------------------------------------------------------------------------------------------------------------------------------------------------------|
| Chemical name (IUPAC)                                                                                                                     | not available                                                                                                                                                                                                                   |
| Chemical name (CA)                                                                                                                        | not available                                                                                                                                                                                                                   |
| CIPAC No                                                                                                                                  | 915                                                                                                                                                                                                                             |
| CAS No                                                                                                                                    | not available                                                                                                                                                                                                                   |
| EC No (EINECS or ELINCS)                                                                                                                  | not available                                                                                                                                                                                                                   |
| FAO Specification (including year of publication)                                                                                         | not available                                                                                                                                                                                                                   |
| Minimum purity of the active substance as manufactured                                                                                    | ≥ 400 g/kg of cleaved fatty acids (free/ester bonded)<br>palmitic acid min 19% of cleaved fatty acids<br>stearic acid min 18% of cleaved fatty acids<br>oleic acid min 37% of cleaved fatty acids<br>acid value min 70 mg KOH/g |
| Identity of relevant impurities (of toxicological, ecotoxicological and/or environmental concern) in the active substance as manufactured | nickel max 0.1 g/kg<br>open for other impurities                                                                                                                                                                                |
| Location of the (proposed) reference specification (for significant impurities)                                                           | RAR Volume 4 (2022)                                                                                                                                                                                                             |
| Molecular formula                                                                                                                         | not available                                                                                                                                                                                                                   |
| Molar mass                                                                                                                                | not available                                                                                                                                                                                                                   |
| Structural formula                                                                                                                        | not available                                                                                                                                                                                                                   |

**Physical and chemical properties (Regulation (EU) N° 283/2013, Annex Part A, point 2)**

|                                                                     |                                                                                                                                                                                                      |
|---------------------------------------------------------------------|------------------------------------------------------------------------------------------------------------------------------------------------------------------------------------------------------|
| Melting point (state purity)                                        | above 60°C (no purity stated)                                                                                                                                                                        |
| Boiling point (state purity)                                        | not relevant                                                                                                                                                                                         |
| Temperature of decomposition (state purity)                         | not relevant                                                                                                                                                                                         |
| Appearance (state purity)                                           | black paste at 20°C, viscous liquid above 60°C with very intensive odour after decomposed fat (no purity stated)                                                                                     |
| Vapour pressure (state temperature, state purity)                   | not relevant                                                                                                                                                                                         |
| Henry's law constant (state temperature)                            | not relevant                                                                                                                                                                                         |
| Solubility in water (state temperature, state purity and pH)        | insoluble (no purity stated)                                                                                                                                                                         |
| Solubility in organic solvents (state temperature, state purity)    | Acetone 20 g/l at 20°C<br>Heptane < 0.001 g/l at 20°C<br>Xylene 500 g/l at 20°C<br>Dichloromethane 100 g/l at 20°C<br>1-butanol 20 g/l at 20°C<br>Ethyl acetate 20 g/l at 20°C<br>(no purity stated) |
| Surface tension (state concentration and temperature, state purity) | not relevant                                                                                                                                                                                         |
| Partition coefficient (state temperature, pH and purity)            | not relevant                                                                                                                                                                                         |
| Dissociation constant (state purity)                                | not relevant                                                                                                                                                                                         |
| UV/VIS absorption (max.) incl. $\epsilon$ (state purity, pH)        | not relevant                                                                                                                                                                                         |
| Flammability (state purity)                                         | not flammable<br>not auto-flammable<br>(no purity stated)                                                                                                                                            |
| Explosive properties (state purity)                                 | not relevant                                                                                                                                                                                         |
| Oxidising properties (state purity)                                 | not relevant                                                                                                                                                                                         |
| Density (temperature and purity)                                    | 930 kg/m <sup>3</sup> at 15°C (no purity stated)                                                                                                                                                     |

**Summary of representative uses evaluated, for which all risk assessments needed to be completed (*Fat Distillation Residues*) (Regulation (EU) N° 284/2013, Annex Part A, points 3, 4)**

| Crop and/or situation (a)                   | Member State or Country | Product name | F G or I (b) | Pests or Group of pests controlled (c)                                                                                                       | Preparation |                                      | Application                                                                     |                                               |                    | Application rate per treatment     |                                      |                    |                                | PHI (days) (m) | Remarks |
|---------------------------------------------|-------------------------|--------------|--------------|----------------------------------------------------------------------------------------------------------------------------------------------|-------------|--------------------------------------|---------------------------------------------------------------------------------|-----------------------------------------------|--------------------|------------------------------------|--------------------------------------|--------------------|--------------------------------|----------------|---------|
|                                             |                         |              |              |                                                                                                                                              | Type (d-f)  | Conc. a.s. (i)                       | Method kind (f-h)                                                               | Range of growth stages & season (j)           | Number min-max (k) | Interval between application (min) | kg of product/1000 seedlings min max | kg a.i./hL min max | Water L/1000 seedlings min max |                |         |
| Seedlings of coniferous and deciduous trees | CZ, SK, DE              | Morsuvin     | F            | Ruminant animals :<br>Deer family ( <i>Cervus Elaphus</i> )<br>Roe family ( <i>Capreolus Capreolus</i> )<br>Fallow Deer ( <i>Dama Dama</i> ) | Paste (PA)  | 255 g/kg quartz sand and 40 g/kg FDR | Coating of individual plants with special brush or with rubber or plastic glove | Seedlings old up to 2 years August - November | 1                  | -                                  | 4 – 5                                | 80                 | 0.2 – 0.25                     | 0.160 – 0.200  | n.a.    |
| Seedlings of coniferous and deciduous trees | CZ, SK, DE              | Morsuvin     | F            | Ruminant animals :<br>Deer family ( <i>Cervus Elaphus</i> )<br>Roe family ( <i>Capreolus Capreolus</i> )<br>Fallow Deer ( <i>Dama Dama</i> ) | Paste (PA)  | 255 g/kg quartz sand and 40 g/kg FDR | Coating of individual plants with special brush or with rubber or plastic glove | Seedlings old 2 - 5 years August - November   | 1                  | -                                  | 5 – 6                                | 80                 | 0.25 – 0.30                    | 0.200 – 0.240  | n.a.    |

(a) For crops, the EU and Codex classifications (both) should be taken into account; where relevant, the use situation should be described (e.g. fumigation of a structure)  
 (b) Outdoor or field use (F), greenhouse application (G) or indoor application (I)  
 (c) e.g. biting and sucking insects, soil born insects, foliar fungi, weeds  
 (d) e.g. wettable powder (WP), emulsifiable concentrate (EC), granule (GR)  
 (e) CropLife International Technical Monograph no 2, 6th Edition. Revised May 2008. Catalogue of pesticide  
 (f) All abbreviations used must be explained  
 (g) Method, e.g. high volume spraying, low volume spraying, spreading, dusting, drench  
 (h) Kind, e.g. overall, broadcast, aerial spraying, row, individual plant, between the plant- type of equipment used must be indicated

(i) g/kg or g/L. Normally the rate should be given for the active substance (according to ISO) and not for the variant in order to compare the rate for same active substances used in different variants (e.g. fluoroxypyr). **In certain cases, where only one variant is synthesised, it is more appropriate to give the rate for the variant (e.g. benthialdicarb-isopropyl).**  
 (j) Growth stage range from first to last treatment (BBCH Monograph, Growth Stages of Plants, 1997, Blackwell, ISBN 3-8263-3152-4), including where relevant, information on season at time of application  
 (k) Indicate the minimum and maximum number of applications possible under practical conditions of use  
 (l) The values should be given in g or kg whatever gives the more manageable number (e.g. 200 kg/ha instead of 200 000 g/ha or 12.5 g/ha instead of 0.0125 kg/ha)  
 (m) PHI - minimum pre-harvest interval

**Summary of additional intended uses for which MRL applications have been made, that in addition to the uses above, have also been considered in the consumer risk assessment (*name of active substance or the respective variant*)**  
**Regulation (EC) N° 1107/2009 Article 8.1(g)**

Not applicable

### Further information, Efficacy

#### Effectiveness (Regulation (EU) N° 284/2013, Annex Part A, point 6.2)

Products with fat distillation residues have been registered in several member states in the EU based on detailed national assessments of the efficacy package in compliance with Annex III data requirements of Directive 91/414/EEC and according to the Uniform Principles.

#### Adverse effects on field crops (Regulation (EU) N° 284/2013, Annex Part A, point 6.4)

Products with fat distillation residues have been registered in several member states in the EU based on detailed national assessments of the efficacy package in compliance with Annex III data requirements of Directive 91/414/EEC and according to the Uniform Principles.

#### Observations on other undesirable or unintended side-effects (Regulation (EU) N° 284/2013, Annex Part A, point 6.5)

Products with fat distillation residues have been registered in several member states in the EU based on detailed national assessments of the efficacy package in compliance with Annex III data requirements of Directive 91/414/EEC and according to the Uniform Principles.

#### Groundwater metabolites: Screening for biological activity (SANCO/221/2000-rev.10-final Step 3 a Stage 1)

Activity against target organism

Not needed

## Methods of Analysis

### Analytical methods for the active substance (Regulation (EU) N° 283/2013, Annex Part A, point 4.1 and Regulation (EU) N° 284/2013, Annex Part A, point 5.2)

|                                                     |                                                                                                                                                                                                                |
|-----------------------------------------------------|----------------------------------------------------------------------------------------------------------------------------------------------------------------------------------------------------------------|
| Technical a.s. (analytical technique)               | GC/FID, GC/MS, chromatographic techniques, TLC, titration methods                                                                                                                                              |
| Impurities in technical a.s. (analytical technique) | GC/FID, GC/MS, chromatographic techniques, TLC, titration methods, AAS, ELISA<br>Data gap : demonstration of applicability of the CSN ISO 8070 method for determination of nickel in fat distillation residues |
| Plant protection product (analytical technique)     | GC-FID<br>Data gap: accuracy of the method for determination of the active substance in the formulation and;<br>Method for determination of the relevant impurity in the formulation                           |

### Analytical methods for residues (Regulation (EU) N° 283/2013, Annex Part A, point 4.2 & point 7.4.2)

#### Residue definitions for monitoring purposes

|                         |                                       |
|-------------------------|---------------------------------------|
| Food of plant origin    | not relevant (no residue definition)  |
| Food of animal origin   | not relevant (no residue definition)  |
| Soil                    | not available (no residue definition) |
| Sediment                | not available (no residue definition) |
| Water surface           | not available (no residue definition) |
| drinking/ground         | not available (no residue definition) |
| Air                     | not available (no residue definition) |
| Body fluids and tissues | not available (no residue definition) |

#### Monitoring/Enforcement methods

|                                                                                               |      |
|-----------------------------------------------------------------------------------------------|------|
| Food/feed of plant origin (analytical technique and LOQ for methods for monitoring purposes)  | none |
| Food/feed of animal origin (analytical technique and LOQ for methods for monitoring purposes) | none |
| Soil (analytical technique and LOQ)                                                           | none |
| Water (analytical technique and LOQ)                                                          | none |
| Air (analytical technique and LOQ)                                                            | none |

Body fluids and tissues (analytical technique and LOQ)

none

**Classification and labelling with regard to physical and chemical data (Regulation (EU) N° 283/2013, Annex Part A, point 10)**

Substance

Fat distillation residues (FDR)

Harmonised classification according to Regulation (EC) No 1272/2008 and its Adaptations to Technical Process [Table 3.1 of Annex VI of Regulation (EC) No 1272/2008 as amended]<sup>1</sup>:

No current harmonised classification. Fat distillation residues will not be classified from physical / chemical point of view.

According to the peer review, criteria for harmonised classification according to Regulation (EC) No 1272/2008 may be met for:

None

<sup>1</sup> Regulation (EC) No 1272/2008 of the European Parliament and of the Council of 16 December 2008 on classification, labelling and packaging of substances and mixtures, amending and repealing Directives 67/548/EEC and 1999/45/EC, and amending Regulation (EC) No 1907/2006. OJ L 353, 31.12.2008, 1-1355.

## Impact on Human and Animal Health

### Absorption, distribution, metabolism and excretion (toxicokinetics) (Regulation (EU) N° 283/2013, Annex Part A, point 5.1)

|                                                             |                                                                                                                                     |
|-------------------------------------------------------------|-------------------------------------------------------------------------------------------------------------------------------------|
| Rate and extent of oral absorption/systemic bioavailability | No data available; not needed (mixture of fatty acids and un-hydrolysed fats)                                                       |
| Toxicokinetics                                              | No data available; not needed (mixture of fatty acids and un-hydrolysed fats)                                                       |
| Distribution                                                | No data available; not needed (mixture of fatty acids and un-hydrolysed fats)                                                       |
| Potential for bioaccumulation                               | No data available; not needed (mixture of fatty acids and un-hydrolysed fats)                                                       |
| Rate and extent of excretion                                | No data available; not needed (mixture of fatty acids and un-hydrolysed fats)                                                       |
| Metabolism in animals                                       | No data available; not needed (mixture of fatty acids and un-hydrolysed fats)                                                       |
| <i>In vitro</i> metabolism                                  | No data available; not needed (mixture of fatty acids and un-hydrolysed fats; PPP used as a repellent, not applied on edible crops) |
| Toxicologically relevant compounds (animals and plants)     | None                                                                                                                                |
| Toxicologically relevant compounds (environment)            | None                                                                                                                                |

### Acute toxicity (Regulation (EU) N° 283/2013, Annex Part A, point 5.2)

|                                 |                                                                                                                                                                                                                                                                                  |  |
|---------------------------------|----------------------------------------------------------------------------------------------------------------------------------------------------------------------------------------------------------------------------------------------------------------------------------|--|
| Rat LD <sub>50</sub> oral       | > 2000 mg/kg bw                                                                                                                                                                                                                                                                  |  |
| Rat LD <sub>50</sub> dermal     | > 2000 mg/kg bw                                                                                                                                                                                                                                                                  |  |
| Rat LC <sub>50</sub> inhalation | No data available; not needed                                                                                                                                                                                                                                                    |  |
| Skin irritation                 | Non-irritant (classification not required)                                                                                                                                                                                                                                       |  |
| Eye irritation                  | Non-irritant (classification not required)                                                                                                                                                                                                                                       |  |
| Skin sensitisation              | Non-sensitizer (GPMT)                                                                                                                                                                                                                                                            |  |
| Phototoxicity                   | Not required (mixture of fatty acids and un-hydrolysed fats; PPP used as a repellent, not applied on edible crops); Information on absorption of electromagnetic radiation and the value of ultraviolet/visible molar extinction/absorption coefficient of FDR is not available. |  |

### Short-term toxicity (Regulation (EU) N° 283/2013, Annex Part A, point 5.3)

|                                |                   |  |
|--------------------------------|-------------------|--|
| Target organ / critical effect | No data available |  |
|--------------------------------|-------------------|--|



|                           |                               |  |
|---------------------------|-------------------------------|--|
| Relevant oral NOAEL       | No data available; not needed |  |
| Relevant dermal NOAEL     | no data available; not needed |  |
| Relevant inhalation NOAEL | Not required                  |  |

**Genotoxicity (Regulation (EU) N° 283/2013, Annex Part A, point 5.4)**

|                            |                                                                |  |
|----------------------------|----------------------------------------------------------------|--|
| <i>In vitro</i> studies    | Negative bacterial reverse mutation test (Supplementary study) |  |
| <i>In vivo</i> studies     | No studies available and not required                          |  |
| Photomutagenicity          | Not required                                                   |  |
| Potential for genotoxicity | FDR is unlikely to be genotoxic                                |  |

**Long-term toxicity and carcinogenicity (Regulation (EU) N°283/2013, Annex Part A, point 5.5)**

|                                                  |                               |  |
|--------------------------------------------------|-------------------------------|--|
| Long-term effects (target organ/critical effect) | No data available             |  |
| Relevant long-term NOAEL                         | Not stated; not needed        |  |
| Carcinogenicity (target organ, tumour type)      | No data available; not needed |  |
| Relevant NOAEL for carcinogenicity               | No data available; not needed |  |

**Reproductive toxicity (Regulation (EU) N° 283/2013, Annex Part A, point 5.6)**

**Reproduction toxicity**

|                                       |                               |  |
|---------------------------------------|-------------------------------|--|
| Reproduction target / critical effect | No data available; not needed |  |
| Relevant parental NOAEL               | Not stated; not needed        |  |
| Relevant reproductive NOAEL           | Not stated; not needed        |  |
| Relevant offspring NOAEL              | Not stated; not needed        |  |

**Developmental toxicity**

|                                        |                                |  |
|----------------------------------------|--------------------------------|--|
| Developmental target / critical effect | No data available ; not needed |  |
| Relevant maternal NOAEL                | Not stated; not needed         |  |
| Relevant developmental NOAEL           | Not stated; not needed         |  |

**Neurotoxicity (Regulation (EU) N° 283/2013, Annex Part A, point 5.7)**

|                                                                              |                                 |  |
|------------------------------------------------------------------------------|---------------------------------|--|
| Acute neurotoxicity                                                          | No data available; not required |  |
| Repeated neurotoxicity                                                       | No data available; not required |  |
| Additional studies (e.g. delayed neurotoxicity, developmental neurotoxicity) | No data available; not required |  |

**Other toxicological studies (Regulation (EU) N° 283/2013, Annex Part A, point 5.8)**

|                                               |                   |  |
|-----------------------------------------------|-------------------|--|
| Supplementary studies on the active substance | No data available |  |
|-----------------------------------------------|-------------------|--|

Endocrine disrupting properties

No data available; not required;  
Due to the phys-chem properties and the (eco) toxicological profile of the active substance the assessment does not appear to be scientifically necessary. Fat distillation residues are unlikely to meet the criteria for endocrine disruption for humans according to point 3.6.5 of Annex II to Regulation (EC) No 1107/2009, as amended by Commission Regulation (EU) 2018/605.

Studies performed on metabolites or impurities

No data available

**Medical data (Regulation (EU) N° 283/2013, Annex Part A, point 5.9)**

Data gap

**Summary<sup>2</sup> (Regulation (EU) N°1107/2009, Annex II, point 3.1 and 3.6)**

Acceptable Daily Intake (ADI)

Acute Reference Dose (ARfD)

Acceptable Operator Exposure Level (AOEL)

Acute Acceptable Operator Exposure Level (AAOEL)

|                                                  | Value<br>(mg/kg bw (per day)) | Study | Uncertainty factor |
|--------------------------------------------------|-------------------------------|-------|--------------------|
| Acceptable Daily Intake (ADI)                    | Not required                  |       |                    |
| Acute Reference Dose (ARfD)                      | Not required                  |       |                    |
| Acceptable Operator Exposure Level (AOEL)        | Not required                  |       |                    |
| Acute Acceptable Operator Exposure Level (AAOEL) | Not required                  |       |                    |

**Dermal absorption (Regulation (EU) N° 284/2013, Annex Part A, point 7.3)**

Representative formulation (*Morsuvin* ,Paste (PA))

No study available; not required

**Exposure scenarios (Regulation (EU) N° 284/2013, Annex Part A, point 7.2)**

Operators

Use: seedlings of conifer and deciduous trees, coating of individual plants with brush or glove, application rate max 0.24 kg a.s./1000 seedlings  
Application of FDR as paste was not considered to be a source of significant exposure

Workers

Application of FDR as paste was not considered to be a source of significant exposure

Bystanders and residents

Application of FDR as paste was not considered to be a source of significant exposure

<sup>2</sup> If available include also reference values for metabolites

**Classification with regard to toxicological data (Regulation (EU) N° 283/2013, Annex Part A, Section 10)**

Substance :

Fat distillation residues

Harmonised classification according to Regulation (EC) No 1272/2008 and its Adaptations to Technical Process [Table 3.1 of Annex VI of Regulation (EC) No 1272/2008 as amended]<sup>3</sup> :

No current harmonised classification

According to the peer review, criteria for harmonised classification according to Regulation (EC) No 1272/2008 may be met for:

None

<sup>3</sup> Regulation (EC) No 1272/2008 of the European Parliament and of the Council of 16 December 2008 on classification, labelling and packaging of substances and mixtures, amending and repealing Directives 67/548/EEC and 1999/45/EC, and amending Regulation (EC) No 1907/2006. OJ L 353, 31.12.2008, 1-1355.

**Residues in or on treated products food and feed**

Not relevant. Consumer exposure via dietary intake to fat distillation residues is not expected following the representative uses.

**Environmental fate and behaviour**

**Route of degradation (aerobic) in soil (Regulation (EU) N° 283/2013, Annex Part A, point 7.1.1.1)**

|                                                                                                  |                |
|--------------------------------------------------------------------------------------------------|----------------|
| Mineralisation after 100 days                                                                    | Not relevant   |
| Non-extractable residues after 100 days                                                          | Not relevant   |
| Metabolites requiring further consideration - name and/or code, % of applied (range and maximum) | No metabolites |

**Route of degradation (anaerobic) in soil (Regulation (EU) N° 283/2013, Annex Part A, point 7.1.1.2)**

|                                                                                                                             |                |
|-----------------------------------------------------------------------------------------------------------------------------|----------------|
| Mineralisation after 100 days                                                                                               | Not relevant   |
| Non-extractable residues after 100 days                                                                                     | Not relevant   |
| Metabolites that may require further consideration for risk assessment - name and/or code, % of applied (range and maximum) | No metabolites |

**Route of degradation (photolysis) on soil (Regulation (EU) N° 283/2013, Annex Part A, point 7.1.1.3)**

|                                                                                                                             |                |
|-----------------------------------------------------------------------------------------------------------------------------|----------------|
| Metabolites that may require further consideration for risk assessment - name and/or code, % of applied (range and maximum) | No metabolites |
| Mineralisation at study end                                                                                                 | Not relevant   |
| Non-extractable residues at study end                                                                                       | Not relevant   |

**Rate of degradation in soil (aerobic) laboratory studies active substance (Regulation (EU) N° 283/2013, Annex Part A, point 7.1.2.1.1 and Regulation (EU) N° 284/2013, Annex Part A, point 9.1.1.1)**

Not relevant

**Rate of degradation in soil (aerobic) laboratory studies transformation products (Regulation (EU) N° 283/2013, Annex Part A, point 7.1.2.1.2 and Regulation (EU) N° 284/2013, Annex Part A, point 9.1.1.1)**

Not relevant

**Rate of degradation field soil dissipation studies (Regulation (EU) N° 283/2013, Annex Part A, point 7.1.2.2.1 and Regulation (EU) N° 284/2013, Annex Part A, point 9.1.1.2.1)**

Not relevant

**Combined laboratory and field kinetic endpoints for modelling (when not from different populations)\***

|                                                                                                      |              |              |
|------------------------------------------------------------------------------------------------------|--------------|--------------|
| Rate of degradation in soil active substance, normalised geometric mean (if not pH dependent)        | Not relevant |              |
| Rate of degradation in soil transformation products, normalised geometric mean (if not pH dependent) | Not relevant | Not relevant |
| Kinetic formation fraction (f. f. $k_f / k_{dp}$ ) of transformation products, arithmetic mean       | Not relevant | Not relevant |

\* Only relevant after implementation of the published EFSA guidance describing how to amalgamate laboratory and field endpoints.

**Soil accumulation (Regulation (EU) N° 283/2013, Annex Part A, point 7.1.2.2.2 and Regulation (EU) N° 284/2013, Annex Part A, point 9.1.1.2.2)**

|                                             |              |
|---------------------------------------------|--------------|
| Soil accumulation and plateau concentration | Not relevant |
|---------------------------------------------|--------------|

**Rate of degradation in soil (anaerobic) laboratory studies active substance (Regulation (EU) N° 283/2013, Annex Part A, point 7.1.2.1.3 and Regulation (EU) N° 284/2013, Annex Part A, point 9.1.1.1)**

Not relevant

**Rate of degradation in soil (anaerobic) laboratory studies transformation products (Regulation (EU) N° 283/2013, Annex Part A, point 7.1.2.1.4 and Regulation (EU) N° 284/2013, Annex Part A, point 9.1.1.1)**

Not relevant

**Rate of degradation on soil (photolysis) laboratory active substance (Regulation (EU) N° 283/2013, Annex Part A, point 7.1.1.3)**

Not relevant

**Soil adsorption active substance (Regulation (EU) N° 283/2013, Annex Part A, point 7.1.3.1.1 and Regulation (EU) N° 284/2013, Annex Part A, point 9.1.2.1)**

Not available

**Soil adsorption transformation products (Regulation (EU) N° 283/2013, Annex Part A, point 7.1.3.1.2 and Regulation (EU) N° 284/2013, Annex Part A, point 9.1.2.1)**

Not relevant

**Mobility in soil column leaching active substance (Regulation (EU) N° 283/2013, Annex Part A, point 7.1.4.1.1 and Regulation (EU) N° 284/2013, Annex Part A, point 9.1.2.1)**

Column leaching

Not relevant

**Mobility in soil column leaching transformation products (Regulation (EU) N° 283/2013, Annex Part A, point 7.1.4.1.2 and Regulation (EU) N° 284/2013, Annex Part A, point 9.1.2.1)**

Column leaching

Not relevant

**Lysimeter / field leaching studies (Regulation (EU) N° 283/2013, Annex Part A, points 7.1.4.2 / 7.1.4.3 and Regulation (EU) N° 284/2013, Annex Part A, points 9.1.2.2 / 9.1.2.3)**

Lysimeter/ field leaching studies

Not relevant

**Hydrolytic degradation (Regulation (EU) N° 283/2013, Annex Part A, point 7.2.1.1)**

Hydrolytic degradation of the active substance and metabolites > 10 %

Not relevant

**Aqueous photochemical degradation (Regulation (EU) N° 283/2013, Annex Part A, points 7.2.1.2 / 7.2.1.3)**

Photolytic degradation of active substance and metabolites above 10 %

Not relevant

Quantum yield of direct phototransformation in water at  $\Sigma > 290$  nm

Not relevant

**'Ready biodegradability' (Regulation (EU) N° 283/2013, Annex Part A, point 7.2.2.1)**

Readily biodegradable (yes/no)

Not available, substance considered not readily biodegradable

**Aerobic mineralisation in surface water (Regulation (EU) N° 283/2013, Annex Part A, point 7.2.2.2 and Regulation (EU) N° 284/2013, Annex Part A, point 9.2.1)**

Not relevant

**Water / sediment study (Regulation (EU) N° 283/2013, Annex Part A, point 7.2.2.3 and Regulation (EU) N° 284/2013, Annex Part A, point 9.2.2)**

Not relevant

**Fate and behaviour in air (Regulation (EU) N° 283/2013, Annex Part A, point 7.3.1)**

Direct photolysis in air

Not relevant

Photochemical oxidative degradation in air

Not relevant

Volatilisation

Not relevant

Metabolites

No metabolites

**Residues requiring further assessment (Regulation (EU) N° 283/2013, Annex Part A, point 7.4.1)**

Environmental occurring residues requiring further assessment by other disciplines (toxicology and ecotoxicology) and or requiring consideration for groundwater exposure

Considering the nature of the substance mixture and the limited exposure from the representative uses, a definition of residue in the environment for risk assessment triggering assessment of effects data is considered unnecessary for fat distillation residues.

**Definition of the residue for monitoring (Regulation (EU) N° 283/2013, Annex Part A, point 7.4.2)**

No residue definitions are proposed for all environmental compartments. Fat distillation residues is expected to follow the normal pathways of dissipation and degradation common to naturally occurring cleaved fatty acid residues of biological origin.

**Monitoring data, if available (Regulation (EU) N° 283/2013, Annex Part A, point 7.5)**

Soil (indicate location and type of study)

Not relevant

Surface water (indicate location and type of study)

Not relevant

Ground water (indicate location and type of study)

Not relevant

Air (indicate location and type of study)

Not relevant

**PEC soil (Regulation (EU) N° 284/2013, Annex Part A, points 9.1.3 / 9.3.1)**

Parent

Not calculated, not relevant

Method of calculation



Application data

Not calculated, not relevant

Not calculated, not relevant

**PEC ground water (Regulation (EU) N° 284/2013, Annex Part A, point 9.2.4.1)**

Method of calculation and type of study (*e.g.* modelling, field leaching, lysimeter)

Not calculated, not relevant

Application rate

Not calculated, not relevant

**PEC(gw) - FOCUS modelling results (80<sup>th</sup> percentile annual average concentration at 1m)**

Not calculated, not relevant

**PEC surface water and PEC sediment (Regulation (EU) N° 284/2013, Annex Part A, points 9.2.5 / 9.3.1)**

Parent

Not calculated, not relevant

Parameters used in FOCUS<sub>sw</sub> step 1 and 2

Parameters used in FOCUS<sub>sw</sub> step 3 (if performed)

Not calculated, not relevant

Application rate

Not calculated, not relevant

Not calculated, not relevant

**Estimation of concentrations from other routes of exposure (Regulation (EU) N° 284/2013, Annex Part A, point 9.4)**

Method of calculation

Not relevant

**PEC**

Maximum concentration

Not relevant

## Ecotoxicology

### Effects on birds and other terrestrial vertebrates (Regulation (EU) N° 283/2013, Annex Part A, point 8.1 and Regulation (EU) N° 284/2013, Annex Part A, point 10.1)

| Species                                                                                                                                                                                                                                                                                                                                                                                                                                                                             | Test substance | Time scale                                    | End point                       | Toxicity (mg/kg bw per day) |
|-------------------------------------------------------------------------------------------------------------------------------------------------------------------------------------------------------------------------------------------------------------------------------------------------------------------------------------------------------------------------------------------------------------------------------------------------------------------------------------|----------------|-----------------------------------------------|---------------------------------|-----------------------------|
| Birds                                                                                                                                                                                                                                                                                                                                                                                                                                                                               |                |                                               |                                 |                             |
| <i>Indicate species</i>                                                                                                                                                                                                                                                                                                                                                                                                                                                             | a.s.           | Acute                                         | LD <sub>50</sub>                | No data available           |
|                                                                                                                                                                                                                                                                                                                                                                                                                                                                                     | Preparation    | Acute                                         | LD <sub>50</sub>                | No data available           |
|                                                                                                                                                                                                                                                                                                                                                                                                                                                                                     | a.s.           | Long-term                                     | NOAEL                           | No data available           |
| Mammals                                                                                                                                                                                                                                                                                                                                                                                                                                                                             |                |                                               |                                 |                             |
| Rat                                                                                                                                                                                                                                                                                                                                                                                                                                                                                 | a.s.           | Acute                                         | LD <sub>50</sub>                | LD <sub>50</sub> >2000      |
|                                                                                                                                                                                                                                                                                                                                                                                                                                                                                     | Preparation    | Acute                                         | LD <sub>50</sub>                | No data available           |
|                                                                                                                                                                                                                                                                                                                                                                                                                                                                                     | a.s.           | Long-term<br>[for first tier risk assessment] | NOAEL<br>[amend as appropriate] | No data available           |
| <p>Endocrine disrupting properties (Annex Part A, points 8.1.5)</p> <p>Due to the phys-chem properties and the (eco) toxicological profile of the active substance the assessment does not appear to be scientifically necessary.</p> <p>Fat distillation residues are unlikely to meet the criteria for endocrine disruption for non-target organisms according to point 3.8.2 of Annex II to Regulation (EC) No 1107/2009, as amended by Commission Regulation (EU) 2018/605.</p> |                |                                               |                                 |                             |
| <p>Additional higher tier studies (Annex Part A, points 10.1.1.2):</p> <p>No data, not required.</p>                                                                                                                                                                                                                                                                                                                                                                                |                |                                               |                                 |                             |
| <p>Terrestrial vertebrate wildlife (birds, mammals, reptile and amphibians) (Annex Part A, points 8.1.4, 10.1.3):</p> <p>No data, not required.</p>                                                                                                                                                                                                                                                                                                                                 |                |                                               |                                 |                             |

### Toxicity/exposure ratios for terrestrial vertebrates (Regulation (EU) N° 284/2013, Part A, Annex point 10.1)

#### Brush or glove application to tree seedlings at 0.160 – 0.240 kg a.s./100 seedlings

No quantitative risk assessment performed since it was not needed for the representative uses.

### Toxicity data for all aquatic tested species (Regulation (EU) N° 283/2013, Annex Part A, points 8.2 and Regulation (EU) N° 284/2013 Annex Part A, point 10.2)

| Group                       | Test substance | Time-scale<br>(Test type)                                         | End point                                                                                                                                                           | Toxicity <sup>1</sup> |
|-----------------------------|----------------|-------------------------------------------------------------------|---------------------------------------------------------------------------------------------------------------------------------------------------------------------|-----------------------|
| Laboratory tests            |                |                                                                   |                                                                                                                                                                     |                       |
| Fish                        |                |                                                                   |                                                                                                                                                                     |                       |
|                             | a.s.           | Acute 96 hr<br>(static, or<br>semi-static<br>or flow-<br>through) | Mortality, LC <sub>50</sub>                                                                                                                                         | No data<br>available  |
|                             | a.s.           | Chronic<br>(static, or<br>semi-static<br>or flow-<br>through)     | Growth, or<br>development, or<br>behaviour, or<br>reproduction NOEC                                                                                                 | No data<br>available  |
| Aquatic invertebrates       |                |                                                                   |                                                                                                                                                                     |                       |
| <i>Daphnia magna</i>        | a.s.           | 48 h (static)                                                     | Immobility, EC <sub>50</sub>                                                                                                                                        | No data<br>available  |
|                             | a.s.           | 21 d (static,<br>or semi-<br>static or<br>flow-<br>through)       | Reproduction or<br>development, NOEC                                                                                                                                | No data<br>available  |
| Sediment-dwelling organisms |                |                                                                   |                                                                                                                                                                     |                       |
| <i>Indicate species</i>     | a.s.           | 28 d (static,<br>or semi-<br>static or<br>flow-<br>through)       | NOEC                                                                                                                                                                | No data<br>available  |
| Algae                       |                |                                                                   |                                                                                                                                                                     |                       |
|                             | a.s.           | 72 h (static,<br>or semi-<br>static or<br>flow-<br>through)       | Growth rate: E <sub>r</sub> C <sub>50</sub><br>(NOEC)<br><br>[Biomass: E <sub>b</sub> C <sub>50</sub><br>(NOEC)<br>Yield: E <sub>y</sub> C <sub>50</sub><br>(NOEC)] | No data<br>available  |
| Higher plant                |                |                                                                   |                                                                                                                                                                     |                       |
| <i>Indicate species</i>     | a.s.           | (static, or<br>semi-static<br>or flow-<br>through)                | Fronds number, EC <sub>50</sub><br>(NOEC)<br><br><u>Fron</u><br><u>d area/fresh</u><br><u>weight/dry weight,</u><br>E <sub>r</sub> C <sub>50</sub> (NOEC)           | No data<br>available  |

| Group                                                                                                                                                                                                                                                                                                                                                                                                                                                                                  | Test substance | Time-scale<br>(Test type) | End point | Toxicity <sup>1</sup> |
|----------------------------------------------------------------------------------------------------------------------------------------------------------------------------------------------------------------------------------------------------------------------------------------------------------------------------------------------------------------------------------------------------------------------------------------------------------------------------------------|----------------|---------------------------|-----------|-----------------------|
| <p>Further testing on aquatic organisms<br/>No data, not required.</p>                                                                                                                                                                                                                                                                                                                                                                                                                 |                |                           |           |                       |
| <p>Potential endocrine disrupting properties (Annex Part A, point 8.2.3)<br/>Due to the phys-chem properties and the (eco) toxicological profile of the active substance the assessment does not appear to be scientifically necessary.<br/>Fat distillation residues are unlikely to meet the criteria for endocrine disruption for non-target organisms according to point 3.8.2 of Annex II to Regulation (EC) No 1107/2009, as amended by Commission Regulation (EU) 2018/605.</p> |                |                           |           |                       |

<sup>1</sup>(<sub>nom</sub>) nominal concentration; (<sub>mm</sub>) mean measured concentration; prep.: preparation; a.s.: active substance

**Bioconcentration in fish (Annex Part A, point 8.2.2.3)**

|                                                                                                 | Active substance  | Metabolite1 | Metabolite2 | Metabolite3 |
|-------------------------------------------------------------------------------------------------|-------------------|-------------|-------------|-------------|
| logP <sub>O/W</sub>                                                                             |                   |             |             |             |
| Steady-state bioconcentration factor (BCF)<br>(total wet weight/normalised to 5% lipid content) | No data available |             |             |             |
| Uptake/depuration kinetics BCF<br>(total wet weight/normalised to 5% lipid content)             |                   |             |             |             |
| Annex VI Trigger for the bioconcentration factor                                                |                   |             |             |             |
| Clearance time (days) (CT <sub>50</sub> )                                                       |                   |             |             |             |
| (CT <sub>90</sub> )                                                                             |                   |             |             |             |
| Level and nature of residues (%) in organisms after the 14 day depuration phase                 |                   |             |             |             |
| Higher tier study                                                                               |                   |             |             |             |
|                                                                                                 |                   |             |             |             |

Peer review of the pesticide risk assessment of the active substance fat distillation residues

**Toxicity/exposure ratios for the most sensitive aquatic organisms (Regulation (EU) N° 284/2013, Annex Part A, point 10.2)**

**FOCUS<sub>sw</sub> step 1-3 - TERs for fat distillation residues: Brush or glove application to tree seedlings at 0.160 – 0.240 kg a.s./100 seedlings**

No quantitative risk assessment performed since it was not needed for the representative uses.

**Effects on bees (Regulation (EU) N° 283/2013, Annex Part A, point 8.3.1 and Regulation (EU) N° 284/2013 Annex Part A, point 10.3.1)\***

\* This section does reflect the new EFSA Guidance Document on bees which has not yet been noted by the Standing Committee on Plants, Animals, Food and Feed.

| Species | Test substance | Time scale/type of endpoint | End point                                                                 | toxicity          |
|---------|----------------|-----------------------------|---------------------------------------------------------------------------|-------------------|
|         | a.s.           | Acute                       | Contact toxicity (LD <sub>50</sub> )<br>Oral toxicity (LD <sub>50</sub> ) | No data available |
|         | a.s.,          | Chronic                     | 10 d-LC50                                                                 | No data available |
|         | a.s.,          | Bee brood development       | NOEClarvae                                                                | No data available |

Potential for accumulative toxicity: *yes/no*

No data, since they were not needed for the representative uses.

Semi-field test (Cage and tunnel test)

No data.

Field tests

No data.

**Risk assessment** for fat distillation residues - Brush or glove application to tree seedlings at 0.160 – 0.240 kg a.s./100 seedlings

No quantitative risk assessment performed since it was not needed for the representative uses.

**Effects on other arthropod species (Regulation (EU) N° 283/2013, Annex Part A, point 8.3.2 and Regulation (EU) N° 284/2013 Annex Part A, point 10.3.2)**

**Laboratory tests with standard sensitive species**

| Species                      | Test Substance       | End point                                                     | Toxicity          |
|------------------------------|----------------------|---------------------------------------------------------------|-------------------|
| <i>Typhlodromus pyri</i>     | a.s.,<br>preparation | Mortality, LR <sub>50</sub><br>Reproduction, ER <sub>50</sub> | No data available |
| <i>Aphidius rhopalosiphi</i> | a.s.,<br>preparation | Mortality, LR <sub>50</sub><br>Reproduction, ER <sub>50</sub> | No data available |

**First tier risk assessment for fat distillation residues - Brush or glove application to tree seedlings at 0.160 – 0.240 kg a.s./100 seedlings**

No quantitative risk assessment performed since it was not needed for the representative uses.

**Effects on non-target soil meso- and macro fauna; effects on soil nitrogen transformation (Regulation (EU) N° 283/2013, Annex Part A, points 8.4, 8.5, and Regulation (EU) N° 284/2013 Annex Part A, points 10.4, 10.5)**

| Test organism              | Test substance | Application method of test a.s./ OM <sup>1</sup> | Time scale | End point                                  | Toxicity          |
|----------------------------|----------------|--------------------------------------------------|------------|--------------------------------------------|-------------------|
| Earthworms                 |                |                                                  |            |                                            |                   |
| <i>Eisenia fetida</i>      | a.s.           | -                                                | Chronic    | Growth, reproduction, behaviour            | No data available |
| Other soil macroorganisms  |                |                                                  |            |                                            |                   |
| <i>Folsomia candida</i>    | a.s.           |                                                  |            | Mortality, reproduction, behaviour         | No data available |
| <i>Hypoaspis aculeifer</i> | a.s.           |                                                  |            | Mortality, growth, reproduction, behaviour | No data available |

<sup>1</sup>To indicate whether the test substance was oversprayed/to indicate the organic content of the test soil (e.g. 5 % or 10 %).

|                                                                                                           |
|-----------------------------------------------------------------------------------------------------------|
| Higher tier testing (e.g. modelling or field studies)<br>No data, not needed for the representative uses. |
|-----------------------------------------------------------------------------------------------------------|

|                         |      |  |                   |
|-------------------------|------|--|-------------------|
| Nitrogen transformation | a.s. |  | No data available |
|-------------------------|------|--|-------------------|

**Toxicity/exposure ratios for soil organisms for fat distillation - Brush or glove application to tree seedlings at 0.160 – 0.240 kg a.s./100 seedlings**

No quantitative risk assessment performed since it was not needed for the representative uses.

**Effects on terrestrial non target higher plants (Regulation (EU) N° 283/2013, Annex Part A, point 8.6 and Regulation (EU) N° 284/2013 Annex Part A, point 10.6)**

Screening data

|                                                                                                     |
|-----------------------------------------------------------------------------------------------------|
| Not required for herbicides or plant growth regulators as ER <sub>50</sub> tests should be provided |
|-----------------------------------------------------------------------------------------------------|



No data available

Laboratory dose response tests

| Species                                                    | Test substance | ER <sub>50</sub> (g/ha) <sup>2</sup> vegetative vigour | ER <sub>50</sub> (g/ha) <sup>2</sup> emergence | Exposure <sup>1</sup> (g/ha) <sup>2</sup> | TER | Trigger |
|------------------------------------------------------------|----------------|--------------------------------------------------------|------------------------------------------------|-------------------------------------------|-----|---------|
| No data available                                          |                |                                                        |                                                |                                           |     |         |
|                                                            |                |                                                        |                                                |                                           |     |         |
| Extended laboratory studies:<br>Semi-field and field test: |                |                                                        |                                                |                                           |     |         |
| No data available                                          |                |                                                        |                                                |                                           |     |         |

<sup>1</sup> explanation of how exposure has been estimated should be provided (e.g. based on Ganzelmeier drift data)

<sup>2</sup> for preparations indicate whether dose is expressed in units of a.s. or preparation

**Effects on biological methods for sewage treatment (Regulation (EU) N° 283/2013, Annex Part A, point 8.8)**

| Test type/organism    | end point         |
|-----------------------|-------------------|
| Activated sludge      | No data available |
| <i>Pseudomonas sp</i> | No data available |

**Monitoring data (Regulation (EU) N° 283/2013, Annex Part A, point 8.9 and Regulation (EU) N° 284/2013, Annex Part A, point 10.8)**

Available monitoring data concerning adverse effect of the a.s.

-

Available monitoring data concerning effect of the PPP.

-

**Definition of the residue for monitoring (Regulation (EU) N° 283/2013, Annex Part A, point 7.4.2) Ecotoxicologically relevant compounds<sup>1</sup>**

| Compartment |   |
|-------------|---|
| soil        | - |
| water       | - |
| sediment    | - |
| groundwater | - |

<sup>1</sup> metabolites are considered relevant when, based on the risk assessment, they pose a risk comparable or higher than the parent

**Classification and labelling with regard to ecotoxicological data (Regulation (EU) N° 283/2013, Annex Part A, Section 10)**

Substance

Fat distillation residues

Harmonised classification according to Regulation (EC) No 1272/2008 and its Adaptations to Technical Process [Table 3.1 of Annex VI of Regulation (EC) No 1272/2008 as amended]<sup>4</sup>:

According to the peer review, criteria for harmonised classification according to Regulation (EC) No 1272/2008 may be met for:

|                                      |
|--------------------------------------|
| No current harmonised classification |
| None                                 |

---

<sup>4</sup> Regulation (EC) No 1272/2008 of the European Parliament and of the Council of 16 December 2008 on classification, labelling and packaging of substances and mixtures, amending and repealing Directives 67/548/EEC and 1999/45/EC, and amending Regulation (EC) No 1907/2006. OJ L 353, 31.12.2008, 1-1355.
